# Supplementary material
Source: ML conference proceedings conference paper supplement (https://proceedings.neurips.cc/paper_files/paper/2018/hash/139c3c1b7ca46a9d4fd6d163d98af635-Abstract.html)
Supplement: Supplementary file [file 139c3c1b7ca46a9d4fd6d163d98af635-Supplemental.zip]

---

# Supplementary material to The Limit Points of (Optimistic) Gradient Descent in Min-Max Optimization

---

## A Missing theorems and proofs

*Proof of Lemma 2.1.* Let  $h(\mathbf{x}, \mathbf{y})$  be the update rule of the dynamics (3). It suffices to show that the Jacobian  $J_{\text{GDA}}$  of  $h$  is invertible and by the use of Inverse Function theorem, the claim follows. After straightforward calculations we get

$$J_{\text{GDA}} = \begin{pmatrix} \mathbf{I}_n - \alpha \nabla_{\mathbf{xx}}^2 f & -\alpha \nabla_{\mathbf{xy}}^2 f \\ \alpha \nabla_{\mathbf{yx}}^2 f & \mathbf{I}_m + \alpha \nabla_{\mathbf{yy}}^2 f \end{pmatrix}, \quad (8)$$

where the Hessian of  $f$  is given by

$$\nabla^2 f = \begin{pmatrix} \nabla_{\mathbf{xx}}^2 f & \nabla_{\mathbf{xy}}^2 f \\ \nabla_{\mathbf{yx}}^2 f & \nabla_{\mathbf{yy}}^2 f \end{pmatrix}. \quad (9)$$

It suffices to show that the matrix below does not have an eigenvalue that is equal to  $-1/\alpha$  (by just subtracting the identity matrix),

$$H_{\text{GDA}} = \begin{pmatrix} -\nabla_{\mathbf{xx}}^2 f & -\nabla_{\mathbf{xy}}^2 f \\ \nabla_{\mathbf{yx}}^2 f & \nabla_{\mathbf{yy}}^2 f \end{pmatrix}. \quad (10)$$

It is easy to see that

$$H_{\text{GDA}} = \begin{pmatrix} -\mathbf{I}_n & \mathbf{0}_{n \times m} \\ \mathbf{0}_{m \times n} & \mathbf{I}_m \end{pmatrix} (\nabla^2 f). \quad (11)$$

If the function  $\nabla f$  is  $L$ -Lipschitz, it follows that  $\|\nabla^2 f\|_2 \leq L$  (Lemma 6 in [6]). Therefore by equation (11) we have that  $\rho(H_{\text{GDA}}) \leq \|H_{\text{GDA}}\|_2 \leq \|\nabla^2 f\|_2 \leq L < \frac{1}{\alpha}$ . The claim follows.  $\square$

*Proof of Lemma 2.4.* By definition of local min-max, it holds that  $\nabla_{\mathbf{xx}}^2 f$  is positive semi-definite and also  $\nabla_{\mathbf{yy}}^2 f$  is negative semi-definite. Hence the symmetric matrix below (matrix  $H_{\text{GDA}}$  is given by equation (10))

$$\frac{1}{2} (H_{\text{GDA}} + H_{\text{GDA}}^\top) = \begin{pmatrix} -\nabla_{\mathbf{xx}}^2 f & \mathbf{0}_{n \times m} \\ \mathbf{0}_{m \times n} & \nabla_{\mathbf{yy}}^2 f \end{pmatrix}$$

is negative semi-definite. We use the Ky Fan inequality which states that the sequence (in decreasing order) of the eigenvalues of  $\frac{1}{2}(H_{\text{GDA}} + H_{\text{GDA}}^\top)$  majorizes the real part of the sequence of the eigenvalues of  $H_{\text{GDA}}$  (see [5], page 4). By assumption that  $H_{\text{GDA}}$  has real eigenvalues we conclude that  $\lambda_{\max}(H_{\text{GDA}}) \leq \frac{1}{2} \lambda_{\max}(H_{\text{GDA}} + H_{\text{GDA}}^\top) \leq 0$  since  $H_{\text{GDA}} + H_{\text{GDA}}^\top$  is negative semi-definite. Therefore the spectrum of  $\tilde{I} + \alpha H_{\text{GDA}}$  lies in  $[-1, 1]$  (since also  $\alpha < 1/L$ ), thus  $(\mathbf{x}^*, \mathbf{y}^*)$  is GDA-stable.  $\square$

*Proof of Lemma 2.6.* Let  $f(x, y) = xy$ . It is clear that critical point  $(0, 0)$  is a local min-max point. Computing the Jacobian of the update rule of dynamics (3) at point  $(0, 0)$  we get that

$$J_{\text{GDA}} = \begin{pmatrix} 1 & -\alpha \\ \alpha & 1 \end{pmatrix}, \quad (12)$$

For any  $\alpha > 0$  we have that the eigenvalues of  $J_{\text{GDA}}$  are  $1 \pm \alpha i$ ,<sup>1</sup> so they have magnitude greater than 1 (and is clear that  $H_{\text{GDA}}$  has complex eigenvalues). It is easy to see that  $x_{t+1}^2 + y_{t+1}^2 = (1 + \alpha^2)(x_t^2 + y_t^2)$ , i.e., inductively we have

$$x_t^2 + y_t^2 = (1 + \alpha^2)^t (x_0^2 + y_0^2),$$

hence GDA dynamics diverges.  $\square$

*Proof of Lemma 2.7.* The proof follows the steps of the proof of Lemma 2.4. Similarly, using Ky Fan inequality we know that for any eigenvalue  $\lambda$  of  $H_{\text{GDA}}$  it holds that

$$\text{Re}(\lambda) \leq \frac{1}{2} \lambda_{\max}(H_{\text{GDA}} + H_{\text{GDA}}^\top) \leq 0.$$

Hence we conclude that  $\text{Re}(\lambda) < 0$ . Additionally, the corresponding eigenvalue of  $J_{\text{GDA}}$  is  $1 + \alpha\lambda$ . By choosing  $\alpha < \min_{\lambda} \{-\frac{\text{Re}(\lambda)}{|\lambda|^2}\}$ , it is easy to see that  $|1 + \alpha\lambda|^2 = 1 + \alpha\text{Re}(\lambda) + \alpha^2|\lambda|^2 < 1$  for all the eigenvalues  $\lambda$  of  $H_{\text{GDA}}$ , hence the eigenvalues of  $J_{\text{GDA}}$  have magnitude less than one.  $\square$

*Proof of Lemma 3.1.* It suffices to show that the Jacobian of  $g$ , denoted by  $J_{\text{OGDA}}$  is invertible and then by Inverse Function theorem the claim follows. After calculations the Jacobian boils down to the following (we set  $F'(\mathbf{x}, \mathbf{y}, \mathbf{z}, \mathbf{w}) = F(\mathbf{z}, \mathbf{w}, \mathbf{x}, \mathbf{y})$ ):

$$J_{\text{OGDA}} = \begin{pmatrix} \mathbf{I}_n - 2\alpha \nabla_{\mathbf{x}\mathbf{x}}^2 F & -2\alpha \nabla_{\mathbf{x}\mathbf{y}}^2 F & \alpha \nabla_{\mathbf{z}\mathbf{z}}^2 F' & \alpha \nabla_{\mathbf{z}\mathbf{w}}^2 F' \\ 2\alpha \nabla_{\mathbf{y}\mathbf{x}}^2 F & \mathbf{I}_m + 2\alpha \nabla_{\mathbf{y}\mathbf{y}}^2 F & -\alpha \nabla_{\mathbf{w}\mathbf{z}}^2 F' & -\alpha \nabla_{\mathbf{w}\mathbf{w}}^2 F' \\ \mathbf{I}_n & \mathbf{0}_{n \times m} & \mathbf{0}_{n \times n} & \mathbf{0}_{n \times m} \\ \mathbf{0}_{m \times n} & \mathbf{I}_m & \mathbf{0}_{m \times n} & \mathbf{0}_{m \times m} \end{pmatrix}, \quad (13)$$

Observe that for  $\alpha = 0$ , the matrix  $J_{\text{GDA}}$  is not invertible, as opposed to the case of GDA which is the identity matrix  $\mathbf{I}_{n+m}$  and hence is invertible. It is easy to see that for  $\alpha = 0$ , then  $g(\mathbf{x}, \mathbf{y}, \mathbf{z}, \mathbf{w}) = (\mathbf{x}, \mathbf{y}, \mathbf{x}, \mathbf{y})$ , namely it is not even 1-1 (not even locally).

The null space of  $J_{\text{OGDA}}$  is the same as the null space of the following matrix  $H_{\text{OGDA}}$  (after row and column operations)

$$H_{\text{OGDA}} = \begin{pmatrix} \mathbf{0}_{n \times n} & \mathbf{0}_{n \times m} & \alpha \nabla_{\mathbf{z}\mathbf{z}}^2 F' & \alpha \nabla_{\mathbf{z}\mathbf{w}}^2 F' \\ \mathbf{0}_{m \times n} & \mathbf{0}_{m \times m} & -\alpha \nabla_{\mathbf{w}\mathbf{z}}^2 F' & -\alpha \nabla_{\mathbf{w}\mathbf{w}}^2 F' \\ \mathbf{I}_n & \mathbf{0}_{n \times m} & \mathbf{0}_{n \times n} & \mathbf{0}_{n \times m} \\ \mathbf{0}_{m \times n} & \mathbf{I}_m & \mathbf{0}_{m \times n} & \mathbf{0}_{m \times m} \end{pmatrix}, \quad (14)$$

It is clear that under the assumption that the Hessian is invertible (see Assumption 1.7), we get that

$$\begin{pmatrix} \nabla_{\mathbf{z}\mathbf{z}}^2 F' & \nabla_{\mathbf{z}\mathbf{w}}^2 F' \\ -\nabla_{\mathbf{w}\mathbf{z}}^2 F' & -\nabla_{\mathbf{w}\mathbf{w}}^2 F' \end{pmatrix} \text{ is invertible} \quad (15)$$

and so is  $H_{\text{OGDA}}$ .  $\square$

*Proof of Lemma 3.4.* A fixed point of the dynamics (4) is of the form  $(\mathbf{x}, \mathbf{y}, \mathbf{x}, \mathbf{y})$  (see Remark 1.5). The Jacobian of the update rule  $g$  becomes as follows:

$$J_{\text{OGDA}} = \begin{pmatrix} \mathbf{I}_n - 2\alpha \nabla_{\mathbf{x}\mathbf{x}}^2 F & -2\alpha \nabla_{\mathbf{x}\mathbf{y}}^2 F & \alpha \nabla_{\mathbf{x}\mathbf{x}}^2 F & \alpha \nabla_{\mathbf{x}\mathbf{y}}^2 F \\ 2\alpha \nabla_{\mathbf{y}\mathbf{x}}^2 F & \mathbf{I}_m + 2\alpha \nabla_{\mathbf{y}\mathbf{y}}^2 F & -\alpha \nabla_{\mathbf{y}\mathbf{x}}^2 F & -\alpha \nabla_{\mathbf{y}\mathbf{y}}^2 F \\ \mathbf{I}_n & \mathbf{0}_{n \times m} & \mathbf{0}_{n \times n} & \mathbf{0}_{n \times m} \\ \mathbf{0}_{m \times n} & \mathbf{I}_m & \mathbf{0}_{m \times n} & \mathbf{0}_{m \times m} \end{pmatrix}. \quad (16)$$

We would like to find a relation between the eigenvalues of matrix (16) and matrix (8) (relate the Jacobian of both dynamics GDA and OGDA). We start with the matrix

$$\lambda \mathbf{I}_{2m+2n} - J_{\text{OGDA}} = \begin{pmatrix} \lambda \mathbf{I}_n - \mathbf{I}_n + 2\alpha \nabla_{\mathbf{x}\mathbf{x}}^2 F & 2\alpha \nabla_{\mathbf{x}\mathbf{y}}^2 F & -\alpha \nabla_{\mathbf{x}\mathbf{x}}^2 F & -\alpha \nabla_{\mathbf{x}\mathbf{y}}^2 F \\ -2\alpha \nabla_{\mathbf{y}\mathbf{x}}^2 F & \lambda \mathbf{I}_m - \mathbf{I}_m - 2\alpha \nabla_{\mathbf{y}\mathbf{y}}^2 F & \alpha \nabla_{\mathbf{y}\mathbf{x}}^2 F & \alpha \nabla_{\mathbf{y}\mathbf{y}}^2 F \\ -\mathbf{I}_n & \mathbf{0}_{n \times m} & \lambda \mathbf{I}_n & \mathbf{0}_{n \times m} \\ \mathbf{0}_{m \times n} & -\mathbf{I}_m & \mathbf{0}_{m \times n} & \lambda \mathbf{I}_m \end{pmatrix}.$$

---

<sup>1</sup>We denote  $i := \sqrt{-1}$ .

The absolute value of the determinant of a matrix remains invariant under row/column operations (add a multiple of a row/column to another row/column or exchange rows/columns). After such operations, the determinant of the matrix above has determinant in absolute value equal to (we assume that  $\lambda \neq 0$ )

$$\det \begin{pmatrix} \lambda \mathbf{I}_n - \mathbf{I}_n + (2 - 1/\lambda)\alpha \nabla_{\mathbf{x}\mathbf{x}}^2 F & (2 - 1/\lambda)\alpha \nabla_{\mathbf{x}\mathbf{y}}^2 F & -\alpha \nabla_{\mathbf{x}\mathbf{x}}^2 F & -\alpha \nabla_{\mathbf{x}\mathbf{y}}^2 F \\ (1/\lambda - 2)\alpha \nabla_{\mathbf{y}\mathbf{x}}^2 F & \lambda \mathbf{I}_m - \mathbf{I}_m + (1/\lambda - 2)\alpha \nabla_{\mathbf{y}\mathbf{y}}^2 F & \alpha \nabla_{\mathbf{y}\mathbf{x}}^2 F & \alpha \nabla_{\mathbf{y}\mathbf{y}}^2 F \\ \mathbf{0}_{n \times n} & \mathbf{0}_{n \times m} & \lambda \mathbf{I}_n & \mathbf{0}_{n \times m} \\ \mathbf{0}_{m \times n} & \mathbf{0}_{m \times m} & \mathbf{0}_{m \times n} & \lambda \mathbf{I}_m \end{pmatrix}.$$

The determinant above is equal to  $\lambda^{m+n}p(\lambda)$ , where

$$p(\lambda) = \det \begin{pmatrix} \lambda \mathbf{I}_n - \mathbf{I}_n + (2 - 1/\lambda)\alpha \nabla_{\mathbf{x}\mathbf{x}}^2 F & (2 - 1/\lambda)\alpha \nabla_{\mathbf{x}\mathbf{y}}^2 F \\ (1/\lambda - 2)\alpha \nabla_{\mathbf{y}\mathbf{x}}^2 F & \lambda \mathbf{I}_m - \mathbf{I}_m + (1/\lambda - 2)\alpha \nabla_{\mathbf{y}\mathbf{y}}^2 F \end{pmatrix}.$$

It is clear that  $\lambda = \frac{1}{2}$  is not an eigenvalue of  $J_{\text{OGDA}}$ . Let  $q_{\text{GDA}}(\lambda)$  be the characteristic polynomial of  $J_{\text{GDA}}$  (8, Jacobian of GDA dynamics at  $(\mathbf{x}, \mathbf{y})$ ). The characteristic polynomial  $q_{\text{OGDA}}$  of  $J_{\text{OGDA}}$  ends up being equal to

$$\det \begin{pmatrix} \lambda^2 \mathbf{I}_n - \lambda \mathbf{I}_n + (2\lambda - 1)\alpha \nabla_{\mathbf{x}\mathbf{x}}^2 F & (2\lambda - 1)\alpha \nabla_{\mathbf{x}\mathbf{y}}^2 F \\ -(2\lambda - 1)\alpha \nabla_{\mathbf{y}\mathbf{x}}^2 F & \lambda^2 \mathbf{I}_m - \lambda \mathbf{I}_m - (2\lambda - 1)\alpha \nabla_{\mathbf{y}\mathbf{y}}^2 F \end{pmatrix}.$$

Therefore

$$q_{\text{OGDA}}(\lambda) = (2\lambda - 1)^{n+m} q_{\text{GDA}} \left( \frac{\lambda^2 + \lambda - 1}{2\lambda - 1} \right). \quad (17)$$

Let  $r$  be an eigenvalue of matrix  $H_{\text{GDA}}$  (10), i.e.,  $r + 1$  is an eigenvalue of  $J_{\text{GDA}}$ . From relation (17) it turns out that the roots of the polynomial

$$\lambda^2 - \lambda(1 + 2r) + r = 0, \quad (18)$$

are eigenvalues of the matrix  $J_{\text{OGDA}}$ . For  $\alpha < \frac{1}{2L}$  it holds that  $|r| < \frac{1}{2}$  and it turns out that all the roots of the quadratic equation (18) have magnitude at most one (see Mathematica code in Section A.1 for a proof of the inequality).  $\square$

*Proof of Lemma 3.5.* The easiest example is  $f(x, y) = xy$ . It is clear that the Jacobian of GDA dynamics (3) is given by

$$J = \begin{pmatrix} 1 & -\alpha \\ \alpha & 1 \end{pmatrix}, \quad (19)$$

which has eigenvalues  $1 \pm \alpha i$  (magnitude greater than one) and hence the critical point  $(0, 0)$  is GDA-unstable. However, the Jacobian of OGDA dynamics (4) is given by

$$J_{\text{OGDA}} = \begin{pmatrix} 1 & -2\alpha & 0 & \alpha \\ 2\alpha & 1 & -\alpha & 0 \\ 1 & 0 & 0 & 0 \\ 0 & 1 & 0 & 0 \end{pmatrix}, \quad (20)$$

which has the four eigenvalues  $\frac{1}{2}(1 \pm \sqrt{1 - 8\alpha^2 \pm 4\sqrt{4\alpha^4 - \alpha^2}})$ . For  $0 < \alpha < 1/2$  all the four eigenvalues have magnitude less than or equal to 1, hence  $(0, 0)$  is OGDA-stable (see mathematica code A.2 for the inequality claim). Another example which is not bilinear (Assumption 1.7 is satisfied) is the function  $\frac{1}{2}x^2 + \frac{1}{2}y^2 + 4xy$  (this is used in the example section).  $\square$

**Theorem A.1** (Center-stable manifold theorem, III.7 [7]). *Let  $x^*$  be a fixed point for the  $C^r$  local diffeomorphism  $g : \mathcal{X} \rightarrow \mathcal{X}$ . Suppose that  $E = E_s \oplus E_u$ , where  $E_s$  is the span of the eigenvectors corresponding to eigenvalues of magnitude less than or equal to one of  $Dg(x^*)$ , and  $E_u$  is the span of the eigenvectors corresponding to eigenvalues of magnitude greater than one of  $Dg(x^*)$ . Then there exists a  $C^r$  embedded disk  $W_{\text{loc}}^{cs}$  of dimension  $\dim(E_s)$  that is tangent to  $E_s$  at  $x^*$  called the local stable center manifold. Moreover, there exists a neighborhood  $B$  of  $x^*$ , such that  $g(W_{\text{loc}}^{cs}) \cap B \subset W_{\text{loc}}^{cs}$ , and  $\cap_{k=0}^{\infty} g^{-k}(B) \subset W_{\text{loc}}^{cs}$ .*

---

<sup>2</sup>Jacobian of function  $g$ .

*Proof of Theorem 2.2 and Theorem 3.2.* It follows the general line of the papers [2, 4, 3, 6, 1]. We assume that the update rule of GDA, OGD dynamics is a diffeomorphism (as proved in Lemmas 2.1 and 3.1). The proof is generic and has appeared in [2]. Let  $A$  be the set of unstable critical points  $x^*$  of a dynamical system with update rule a function  $g : \mathcal{X} \rightarrow \mathcal{X}$  (in  $C^2$ ). For each  $x^* \in A$ , there is an associated open neighborhood  $B_{x^*}$  promised by the Stable Manifold Theorem A.1.  $\cup_{x^* \in A} B_{x^*}$  forms an open cover, and since  $\mathcal{X}$  is second-countable we can extract a countable subcover, so that  $\cup_{x^* \in A} B_{x^*} = \cup_{i=1}^{\infty} B_{x_i^*}$ .

Define  $W = \{x_0 : \lim_k x_k \in A\}$  (stable set of  $A$ ). Fix a point  $x_0 \in W$ . Since  $x_k \rightarrow x^* \in A$ , then for some non-negative integer  $T$  and all  $t \geq T$ ,  $g^t(x_0) \in \cup_{x^* \in A} B_{x^*}$ . Since we have a countable sub-cover,  $g^t(x_0) \in B_{x_i^*}$  for some  $x_i^* \in A$  and all  $t \geq T$ . This implies that  $g^t(x_0) \in \cap_{k=0}^{\infty} g^{-k}(B_{x_i^*})$  for all  $t \geq T$ . By Theorem A.1,  $S_i \triangleq \cap_{k=0}^{\infty} g^{-k}(B_{x_i^*})$  is a subset of the local center stable manifold which has co-dimension at least one, and  $S_i$  is thus measure zero.

Finally,  $g^T(x_0) \in S_i$  implies that  $x_0 \in g^{-T}(S_i)$ . Since  $T$  is unknown we union over all non-negative integers, to obtain  $x_0 \in \cup_{j=0}^{\infty} g^{-j}(S_i)$ . Since  $x_0$  was arbitrary, we have shown that  $W \subset \cup_{i=1}^{\infty} \cup_{j=0}^{\infty} g^{-j}(S_i)$ . Using Lemma 1 of page 5 in [2] and that countable union of measure zero sets is measure zero,  $W$  has measure zero. □

#### A.1 Mathematica code for proving claim in Lemma 3.4

```
Reduce[Norm[r] < 1/2 && Norm[1 + r] < 1
&& (Norm[r + 1/2 - 1/2*Sqrt[4 r^2 + 1]] > 1
|| Norm[r + 1/2 + 1/2*Sqrt[4 r^2 + 1]] > 1), r, Complexes]
```

False

#### A.2 Mathematica code for proving claim in Lemma 3.5

```
Reduce[Abs[1/2 (1 + Sqrt[1 - 8 x^2 + 4 Sqrt[-x^2 + 4 x^4]])] > 1 &&
0 < x < 1/2]
```

False

```
Reduce[Abs[1/2 (1 - Sqrt[1 - 8 x^2 - 4 Sqrt[-x^2 + 4 x^4]])] > 1 &&
0 < x < 1/2]
```

False

```
Reduce[Abs[1/2 (1 + Sqrt[1 - 8 x^2 - 4 Sqrt[-x^2 + 4 x^4]])] > 1 &&
0 < x < 1/2]
```

False

```
Reduce[Abs[1/2 (1 - Sqrt[1 - 8 x^2 + 4 Sqrt[-x^2 + 4 x^4]])] > 1 &&
0 < x < 1/2]
```

False

## References

- [1] Chi Jin, Yuchen Zhang, Sivaraman Balakrishnan, Martin J. Wainwright, and Michael I. Jordan. Local maxima in the likelihood of gaussian mixture models: Structural results and algorithmic consequences. In *Advances in Neural Information Processing Systems 29: Annual Conference on Neural Information Processing Systems 2016, December 5-10, 2016, Barcelona, Spain*, pages 4116–4124, 2016.

- [2] Jason D. Lee, Ioannis Panageas, Georgios Piliouras, Max Simchowitz, Michael I. Jordan, and Benjamin Recht. First-order methods almost always avoid saddle points. *CoRR*, abs/1710.07406, 2017.
- [3] Jason D. Lee, Max Simchowitz, Michael I. Jordan, and Benjamin Recht. Gradient descent only converges to minimizers. In *Proceedings of the 29th Conference on Learning Theory, COLT 2016, New York, USA, June 23-26, 2016*, pages 1246–1257, 2016.
- [4] Ruta Mehta, Ioannis Panageas, and Georgios Piliouras. Natural selection as an inhibitor of genetic diversity: Multiplicative weights updates algorithm and a conjecture of haploid genetics. In *Innovations in Theoretical Computer Science, ITCS*, 2015.
- [5] Mohammad Sal Moslehian. Ky fan inequalities. *CoRR*, abs/1108.1467, 2011.
- [6] Ioannis Panageas and Georgios Piliouras. Gradient descent only converges to minimizers: Non-isolated critical points and invariant regions. In *8th Innovations in Theoretical Computer Science Conference, ITCS 2017, January 9-11, 2017, Berkeley, CA, USA*, pages 2:1–2:12, 2017.
- [7] Michael Shub. *Global Stability of Dynamical Systems*. Springer Science & Business Media, 1987.
